# Supplementary material for: Antibiofilm, antimicrobial and cytotoxic activity of extracellular green-synthesized silver nanoparticles by two marine-derived actinomycete
Source: PubMed Central journal article supplement — RSC Adv. 2020 Mar 11;10(17):10361–7. doi: 10.1039/c9ra11021f (PMC9050352; doi:10.1039/c9ra11021f), 2020-03-11
Supplement: RA-010-C9RA11021F-s001.pdf [file RA-010-C9RA11021F-s001.pdf]

## Electronic Supporting Information

*for*

### **Antibiofilm, Antimicrobial and cytotoxic activity of extracellular green synthesized silver nanoparticles by two marine-derived actinomycetes**

**Ahmed A. Hamed,<sup>‡a,b</sup> Hoda Kabary,<sup>c</sup> Mohamed Khedr,<sup>d</sup> Ahmed N. Emam<sup>‡e,f,g</sup>**

<sup>a</sup> *Microbial Chemistry Department, National Research Centre, 33 El-Buhouth Street, P.O. Box 12622, Dokki, Giza, Egypt.*

<sup>b</sup> *Marine Biodiscovery Centre, Department of Chemistry, University of Aberdeen, Aberdeen AB24 3UE, Scotland, UK.*

<sup>c</sup> *Department Agricultural Microbiology, National Research Center, 33 El Buhouth St., Dokki, Postal Code 12622, Giza, Egypt.*

<sup>d</sup> *Botany and Microbiology Department, Faculty of Science, Al-Azhar University, P.O. Box 11651, Nasr City, Cairo, Egypt.*

<sup>e</sup> *Refractories, Ceramics and Building Materials Department, National Research Centre (NRC), 33 Buhouth St., P.O.12622 Dokki, Giza, Egypt.*

<sup>f</sup> *Nanomedicine and Tissue Culture Lab., Medical Research Center of Excellence, National Research Centre (NRC), Buhouth St., P.O.12622 Dokki, Giza, Egypt.*

<sup>g</sup> *Egyptian Nanotechnology Centre (EGNC), Cairo University, El-Sheikh Zayed City Campus, 6<sup>th</sup> of October City, Egypt.*

# Figures

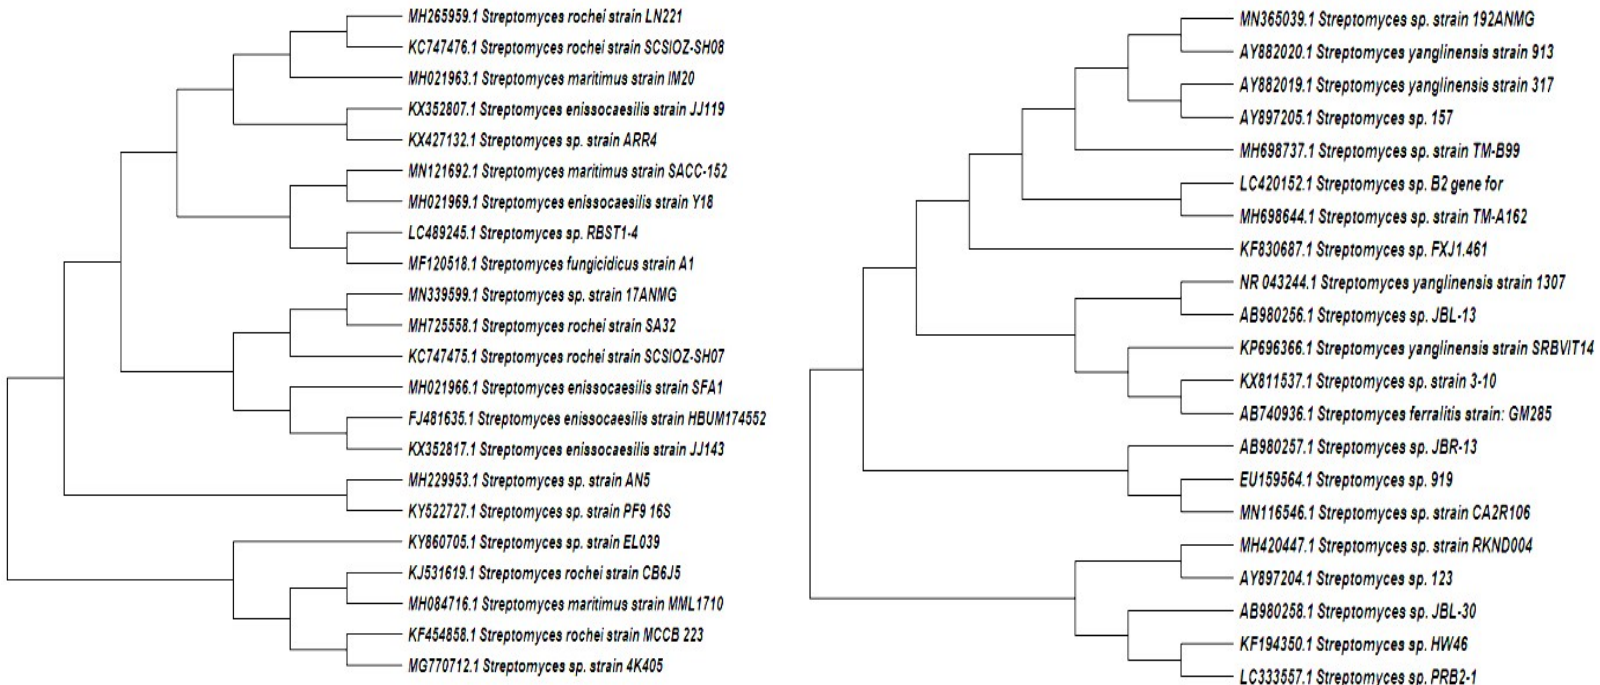

**Fig. S1** Constructed tree using the Neighbour-Joining method to match the two bacteria 17ANMG and 192ANMG to already published sequences

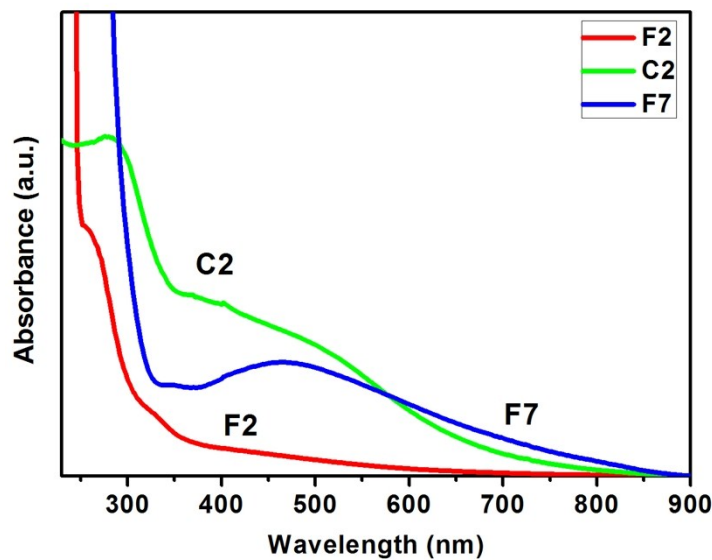

**Fig. S2:** Absorption spectra of Silver Nanoparticles synthesized in the presence of *Streptomyces sp.* 192ANMG bacterial supernatant (F2), cellular filtrate (C2), and *Streptomyces sp.* 17ANMG supernatant (F7)

## Tables

**Table S1. Antibacterial effect of AgNPs produced by culture filtrates (F) and cell filtrate (C) on different pathogenic microbes**

| Test microbes        | Zone of inhibition (cm) |      |             |      |         |      |         |      |        |      |        |      |             |      |        |      |        |      |
|----------------------|-------------------------|------|-------------|------|---------|------|---------|------|--------|------|--------|------|-------------|------|--------|------|--------|------|
|                      | 191ANMG                 |      | 192ANMG     |      | 193ANMG |      | 194ANMG |      | 15ANMG |      | 16ANMG |      | 17ANMG      |      | 18ANMG |      | 19ANMG |      |
|                      | F1                      | C1   | F2          | C2   | F3      | C3   | F4      | C4   | F5     | C5   | F6     | C6   | F7          | C7   | F8     | C8   | F9     | C9   |
| <i>P. aeruginosa</i> | 0.85                    | 1.10 | <b>1.80</b> | 1.03 | 1.45    | 0.70 | 1.45    | 0.70 | 1.45   | 0.90 | 1.2    | 1.08 | <b>1.35</b> | 0.68 | 1.1    | 0.75 | 0.38   | 0.75 |
| <i>E. coli</i>       | 0.00                    | 0.65 | <b>0.90</b> | 0.63 | 0.70    | 0.33 | 0.85    | 0.00 | 0.65   | 0.00 | 0.40   | 0.65 | <b>0.68</b> | 0.90 | 0.65   | 0.63 | 0.63   | 0.68 |
| <i>K. pneumonia</i>  | 0.45                    | 0.70 | <b>0.70</b> | 0.08 | 0.53    | 0.03 | 0.68    | 0.03 | 0.58   | 0.00 | 0.53   | 0.63 | <b>0.68</b> | 0.53 | 0.65   | 0.53 | 0.25   | 0.00 |
| <i>E. cloacae</i>    | 1.40                    | 1.25 | <b>1.35</b> | 1.40 | 1.50    | 1.35 | 1.60    | 1.20 | 1.55   | 1.25 | 1.48   | 1.70 | <b>1.88</b> | 0.65 | 1.53   | 0.60 | 1.30   | 1.05 |
| <i>C. albicans</i>   | 0.53                    | 0.65 | <b>0.98</b> | 0.73 | 1.00    | 0.63 | 0.85    | 0.53 | 0.83   | 0.55 | 0.85   | 0.95 | <b>0.88</b> | 1.05 | 0.80   | 1.00 | 0.08   | 0.83 |
| <i>B. subtilis</i>   | 0.08                    | 0.40 | <b>0.63</b> | 0.40 | 0.58    | 0.13 | 0.60    | 0.13 | 0.35   | 0.03 | 0.58   | 0.03 | <b>0.68</b> | 0.00 | 0.60   | 0.58 | 0.00   | 0.03 |
| <i>M. luteus</i>     | 0.03                    | 0.68 | <b>0.58</b> | 0.13 | 0.63    | 0.65 | 0.75    | 0.70 | 0.75   | 0.55 | 0.58   | 0.43 | <b>0.70</b> | 0.58 | 0.45   | 0.50 | 0.08   | 0.35 |
| <i>A. hydrophila</i> | 0.03                    | 0.03 | <b>0.18</b> | 0.08 | 0.05    | 0.03 | 0.00    | 0.1  | 0.00   | 0.03 | 0.00   | 0.08 | <b>0.00</b> | 0.80 | 0.00   | 0.00 | 0.00   | 0.08 |
| <i>S. aureus</i>     | 0.00                    | 0.00 | <b>0.05</b> | 0.03 | 0.10    | 0.08 | 0.13    | 0.10 | 0.08   | 0.13 | 0.00   | 0.10 | <b>0.00</b> | 0.00 | 0.00   | 0.05 | 0.00   | 0.00 |
| <i>MRSA</i>          | 0.00                    | 0.70 | <b>0.38</b> | 0.58 | 0.40    | 0.60 | 0.48    | 0.60 | 0.08   | 0.55 | 0.35   | 0.53 | <b>0.55</b> | 0.58 | 0.50   | 0.53 | 0.00   | 0.15 |
| <i>Erwinia spp.</i>  | 0.68                    | 0.00 | <b>0.98</b> | 0.00 | 0.90    | 0.00 | 0.83    | 0.00 | 0.75   | 0.00 | 0.60   | 0.50 | <b>0.80</b> | 0.55 | 0.65   | 0.50 | 0.00   | 0.55 |

**Comment [DANE]:** Query: According to the Table S1, the codes and/or names of the bacterial isolates should be given.  
Answer: Done
